# Supplementary material
Source: PubMed Central journal article supplement (PMC5511694)
Supplement: NIHMS876020-supplement-supplemental_information.pdf [file NIHMS876020-supplement-supplemental_information.pdf]

**Supplementary Information:**

**Predicting Molecular Crowding Effects in Ion-RNA Interactions**

**Tao Yu<sup>1,2</sup>, Yuhong Zhu<sup>1,3</sup>, Zhaojian He<sup>1</sup>, Shi-Jie Chen<sup>1\*</sup>**

<sup>1</sup>Department of Physics, Department of Biochemistry, and Informatics Institute, University of Missouri, Columbia, MO 65211

<sup>2</sup>Department of Physics, Jiangnan University, Wuhan, Hubei 430056, China

<sup>2</sup>Department of Physics, Hangzhou Normal University, Hangzhou, Zhejiang 310036, China

---

\* Author to whom correspondence should be addressed; E-mail: [chenshi@missouri.edu](mailto:chenshi@missouri.edu)

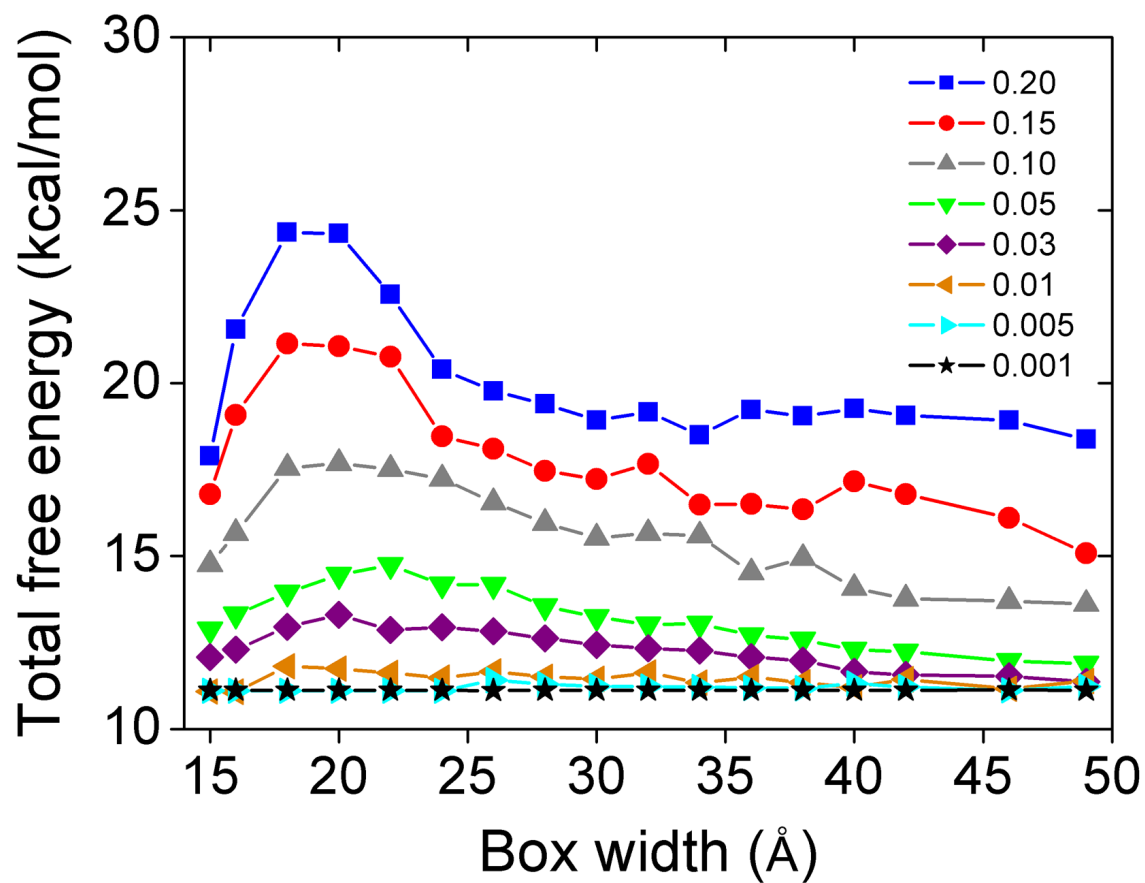

Figure S1: The dependence of the total free energy  $\Delta G_{\text{tot}}$  on the ISB box width for the different crowder volume fractions for a 12-bp RNA helix. For all these cases, the solution contains 0.1M NaCl and 0.01M MgCl<sub>2</sub>.

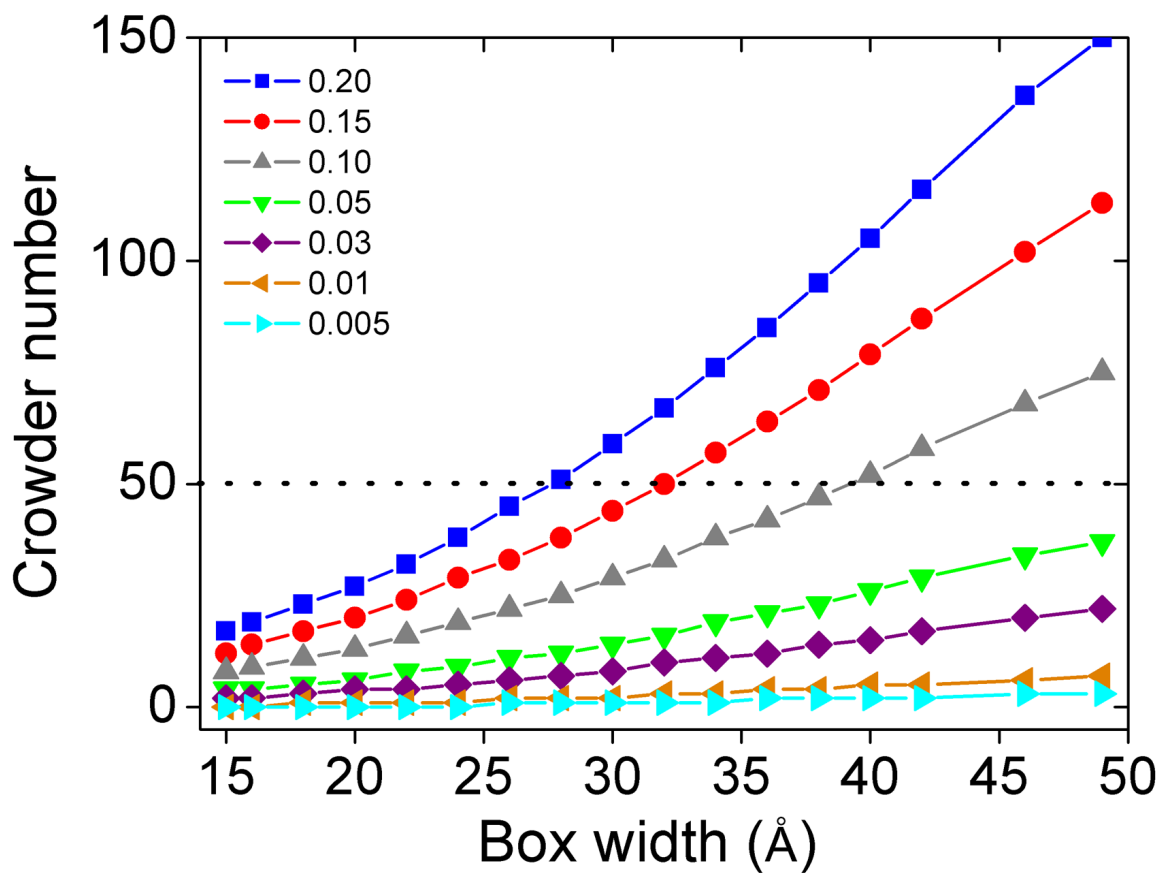

Figure S2: The number of crowders inside the ISB as a function of the ISB box width for a 12-bp RNA helix for the different volume fraction values

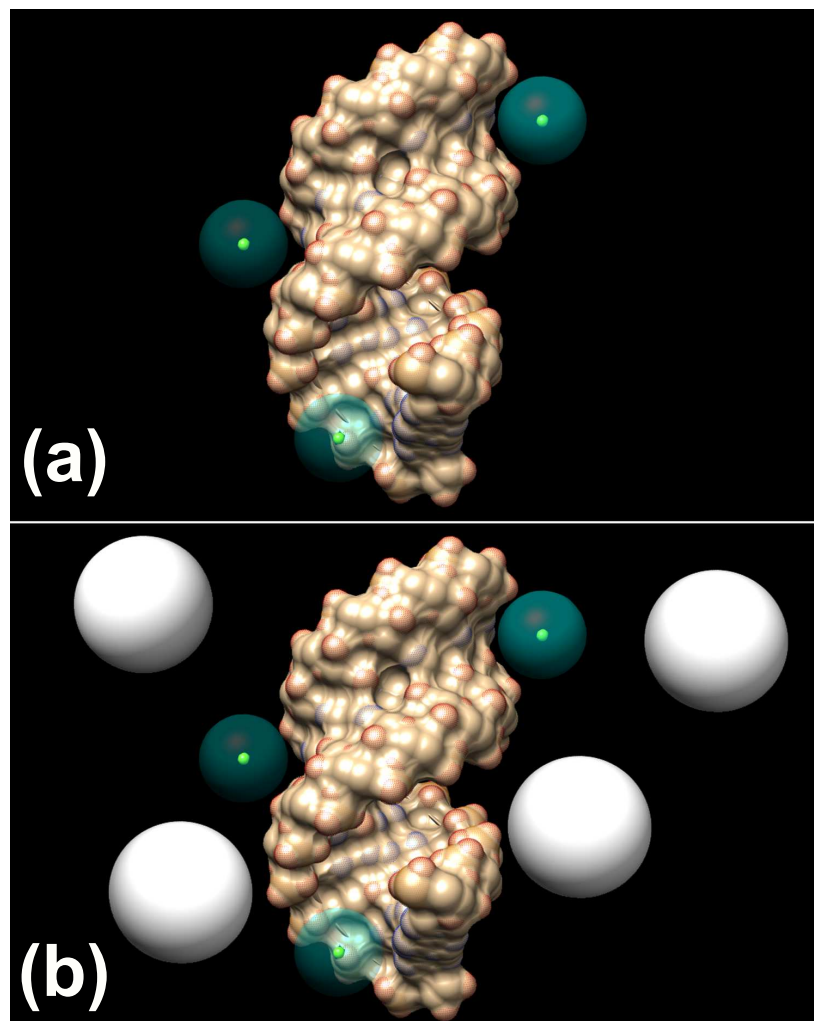

Figure S3: Ion-crowder competition in RNA binding for a 12-bp helix. (a) ions only and (b) ions and crowders in competition. The white and dark green spheres represent the crowders and  $Mg^{2+}$  ions, respectively.

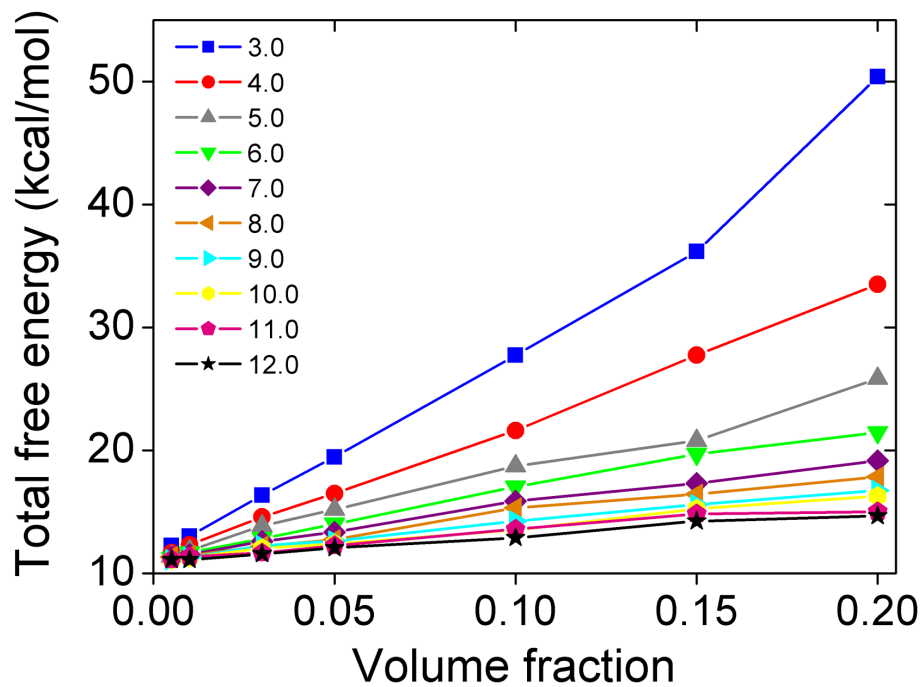

Figure S4: Total free energy  $\Delta G_{\text{tot}}$  for a 12-bp helix structure in a crowded solution as a function of the crowder volume fraction for the different crowder sizes. For all these cases, the solution contains 0.1M NaCl and 0.01M MgCl<sub>2</sub>.

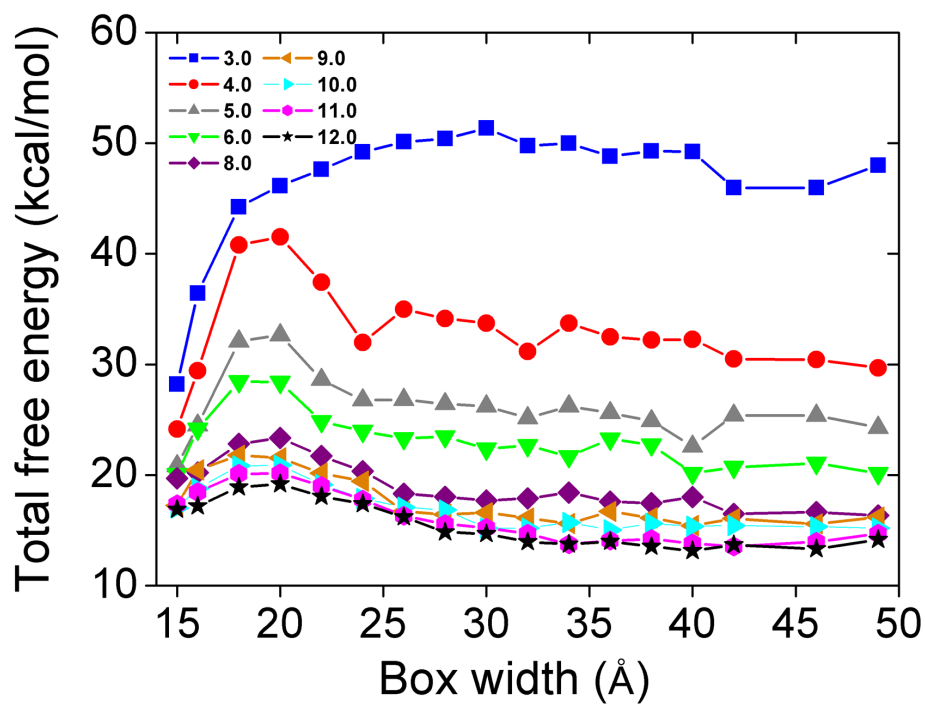

Figure S5: Total free energy  $\Delta G_{\text{tot}}$  for a 12-bp helix structure in a crowded solution as a function of the ISB box width for the different crowder sizes. For all these cases, the solution contains 0.1M NaCl and 0.01M MgCl<sub>2</sub>.

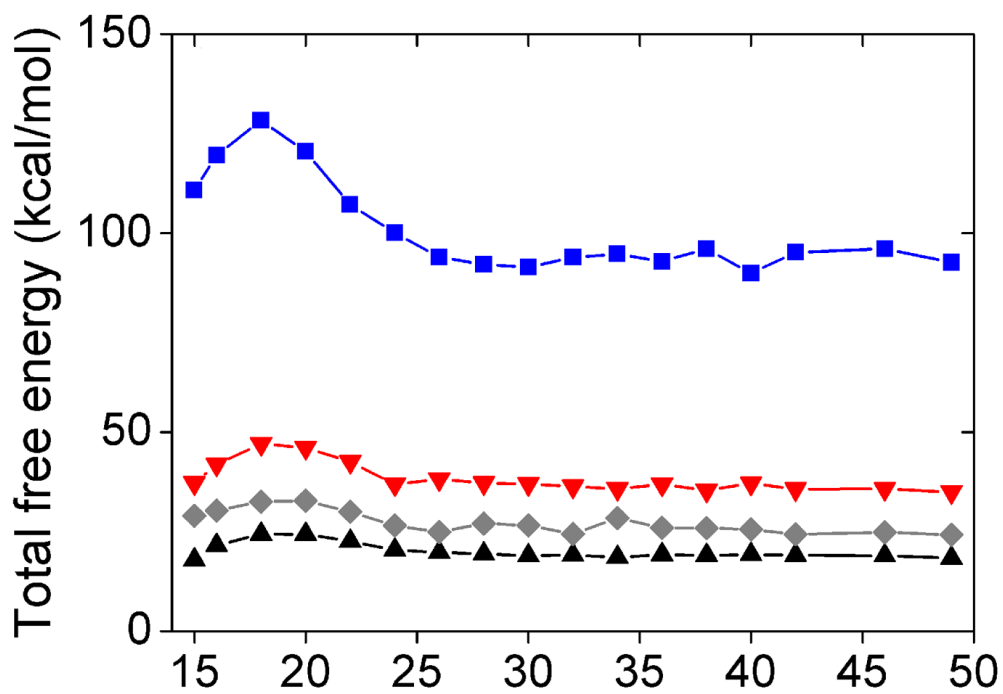

Figure S6: Total free energy  $\Delta G_{tot}$  predicted with the different ISB box widths for four representative RNA structures: tRNA (blue square), mRNA (red down triangle), BWYV (gray diamond), and 12-bp RNA (black up triangle).
